# Supplementary material for: Dual function of precisely modified hydroxy-PS- b -PMMA as neutral layers and thin films for perpendicularly oriented lamella
Source: Royal Society of Chemistry journal article supplement (doi:10.1039/d4lf00197d), 2024-08-24
Supplement: d4lf00197d1.pdf [file d4lf00197d1.pdf]

## Supporting Information

### Dual function of precisely modified hydroxy-PS-*b*-PMMA as neutral layers and thin films for perpendicularly oriented lamella

Riku Mizusaki,<sup>a</sup> Shinsuke Maekawa,<sup>a</sup> Takehiro Seshimo,<sup>b</sup> Takahiro Dazai,<sup>b</sup> Kazufumi Sato,<sup>b</sup> Kan Hatakeyama-Sato,<sup>a</sup> Yuta Nabae<sup>a</sup> and Teruaki Hayakawa<sup>a\*</sup>

\*Corresponding author Email: hayakawa.t.ac@m.titech.ac.jp

<sup>a</sup> School of Materials and Chemical Technology, Tokyo Institute of Technology, 2-12-S8-36 Ookayama, Meguro-ku, Tokyo, Japan.

<sup>b</sup> TOKYO OHKA KOGYO CO., LTD., 1590 Tabata, Samukawa-machi, Koza-gun, Kanagawa, Japan.

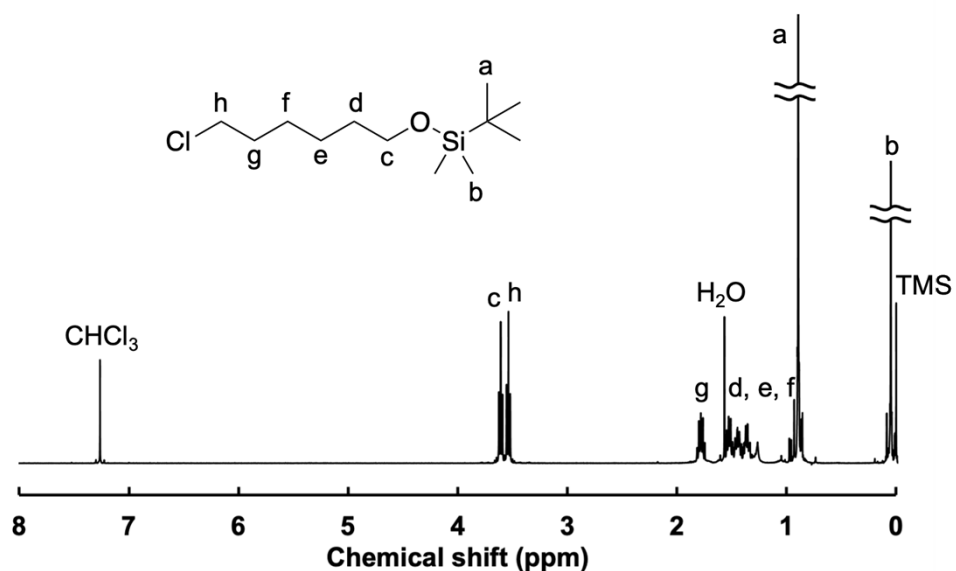

Fig. S1 <sup>1</sup>H NMR spectrum of ClC<sub>6</sub>OTBS in CDCl<sub>3</sub>.<sup>1</sup>

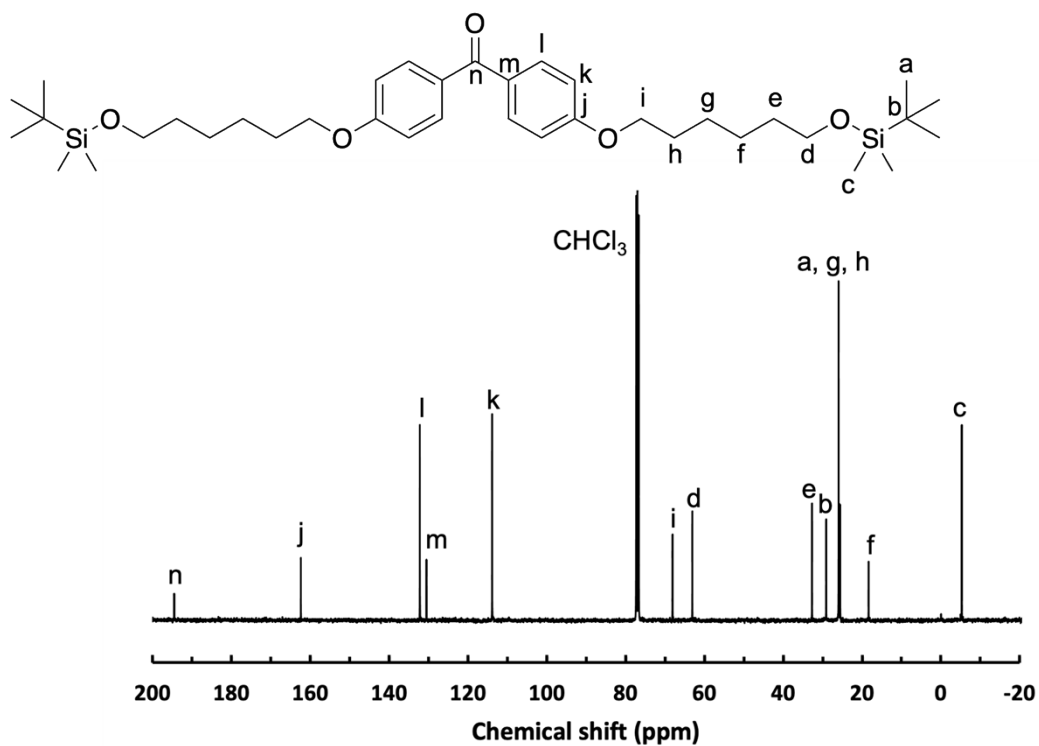

Fig. S2  $^1\text{H}$  NMR spectrum of BP-(OTBS) $_2$  in  $\text{CDCl}_3$ .

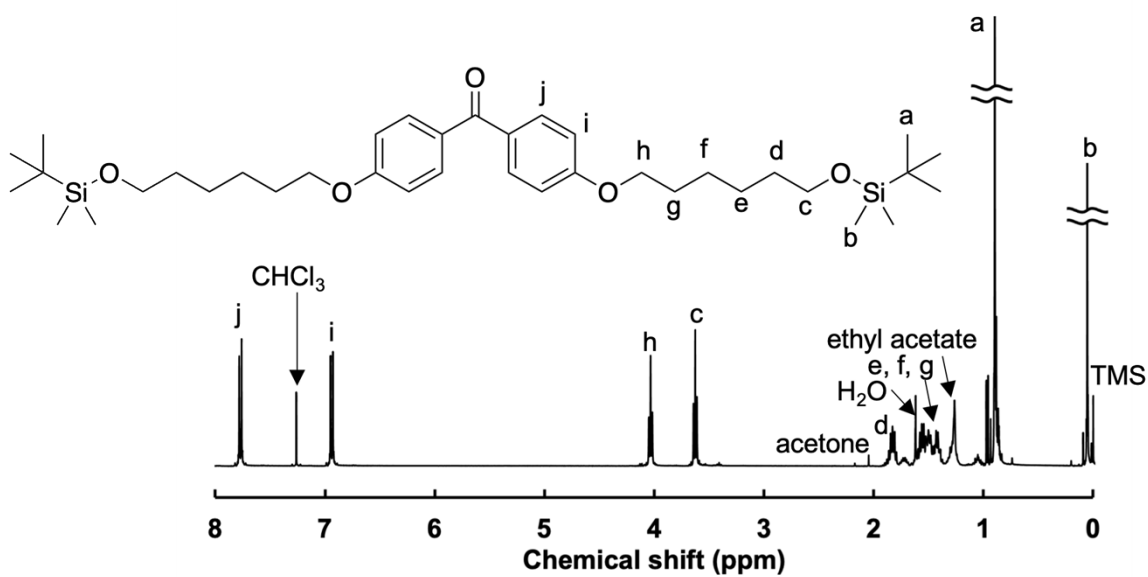

Fig. S3  $^{13}\text{C}$  NMR spectrum of BP-(OTBS) $_2$  in  $\text{CDCl}_3$ .

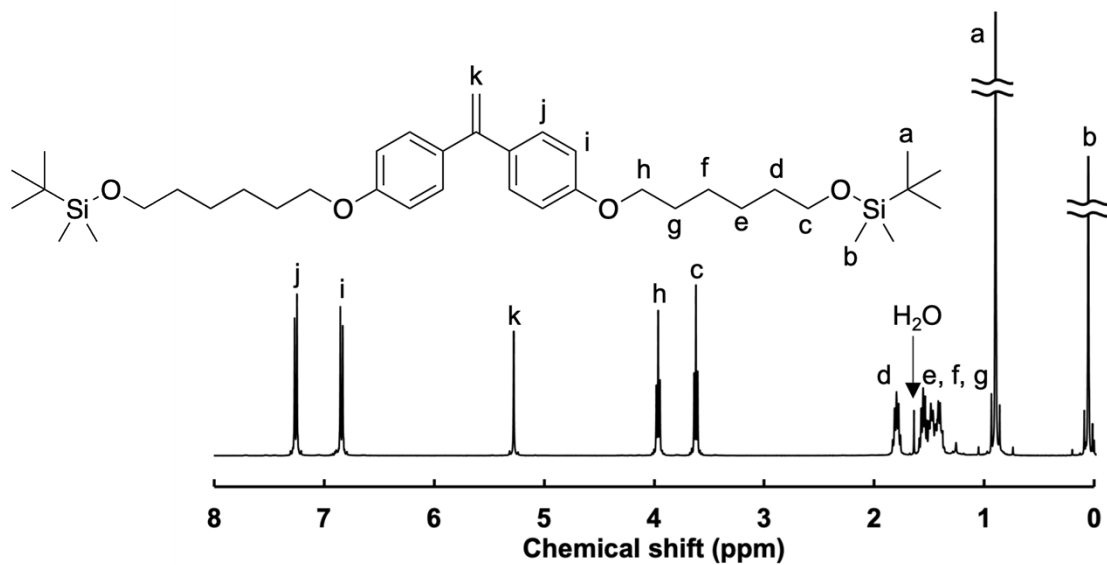

Fig. S4 <sup>1</sup>H NMR spectrum of DPE-(OTBS)<sub>2</sub> in CDCl<sub>3</sub>.

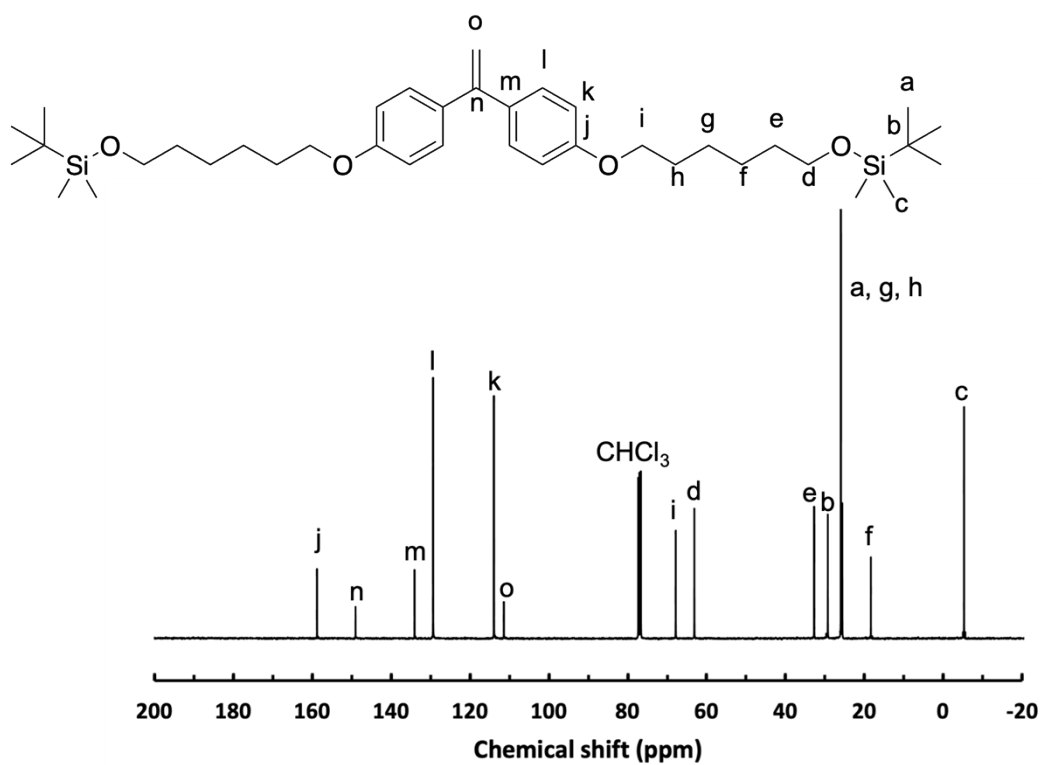

Fig. S5 <sup>13</sup>C NMR spectrum of DPE-(OTBS)<sub>2</sub> in CDCl<sub>3</sub>.

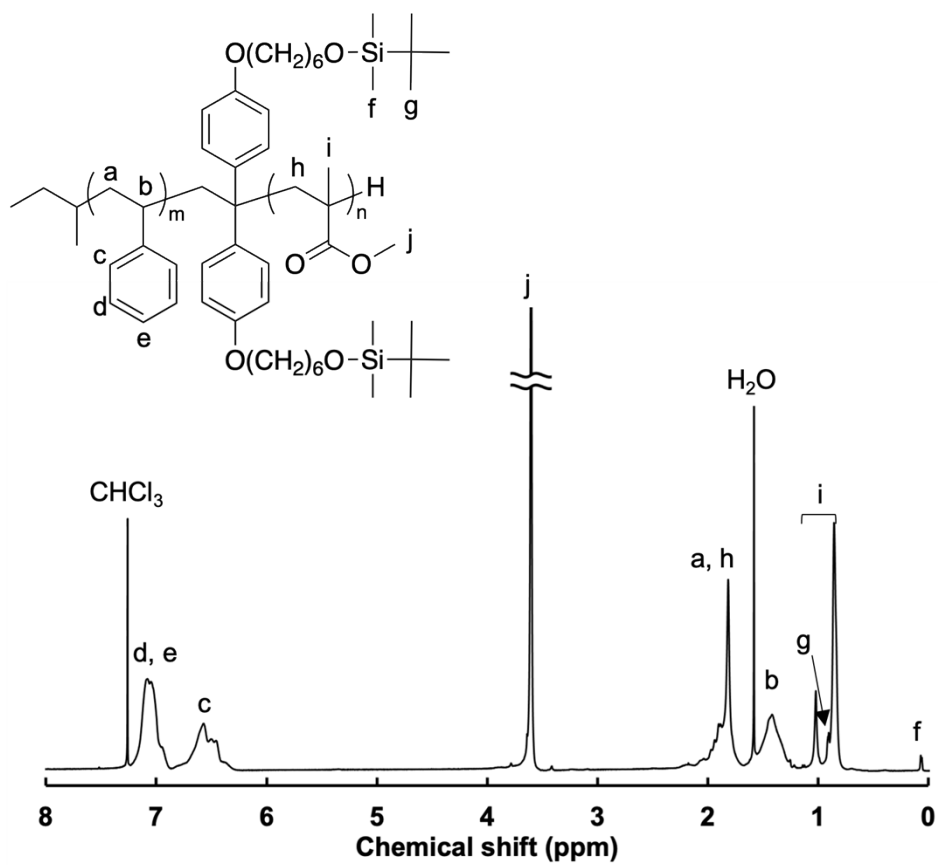

Fig. S6  $^1\text{H}$  NMR spectrum of PS-(OTBS) $_2$ -PMMA in  $\text{CDCl}_3$  without TMS.

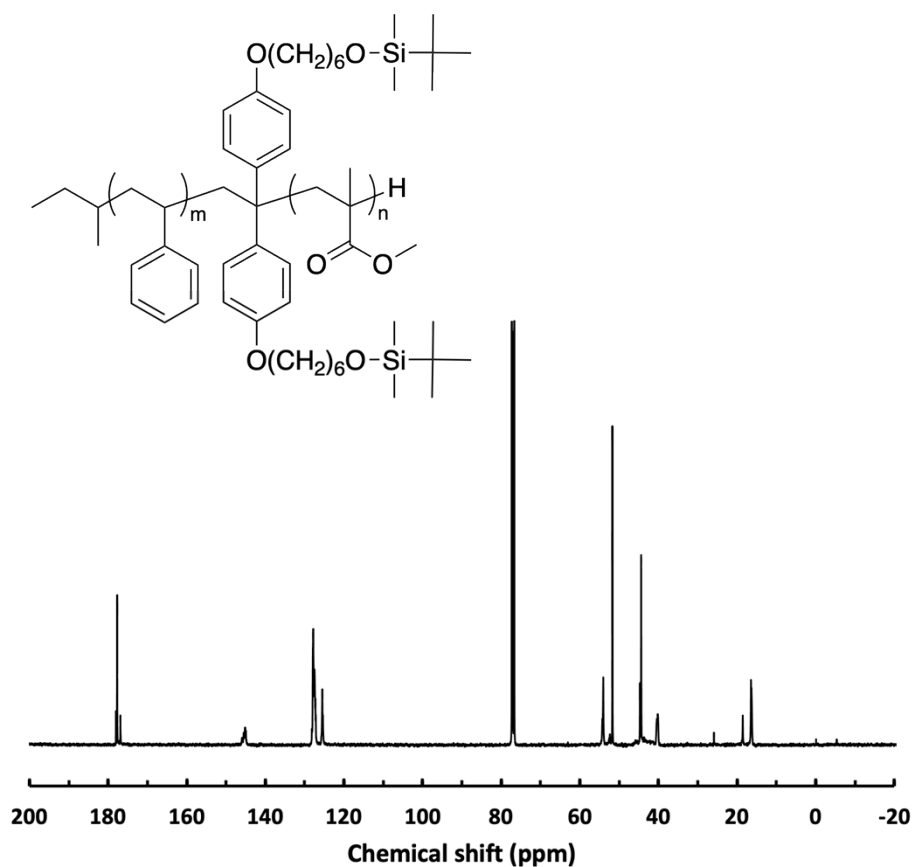

Fig. S7  $^{13}\text{C}$  NMR spectrum of PS-(OTBS) $_2$ -PMMA in  $\text{CDCl}_3$ .

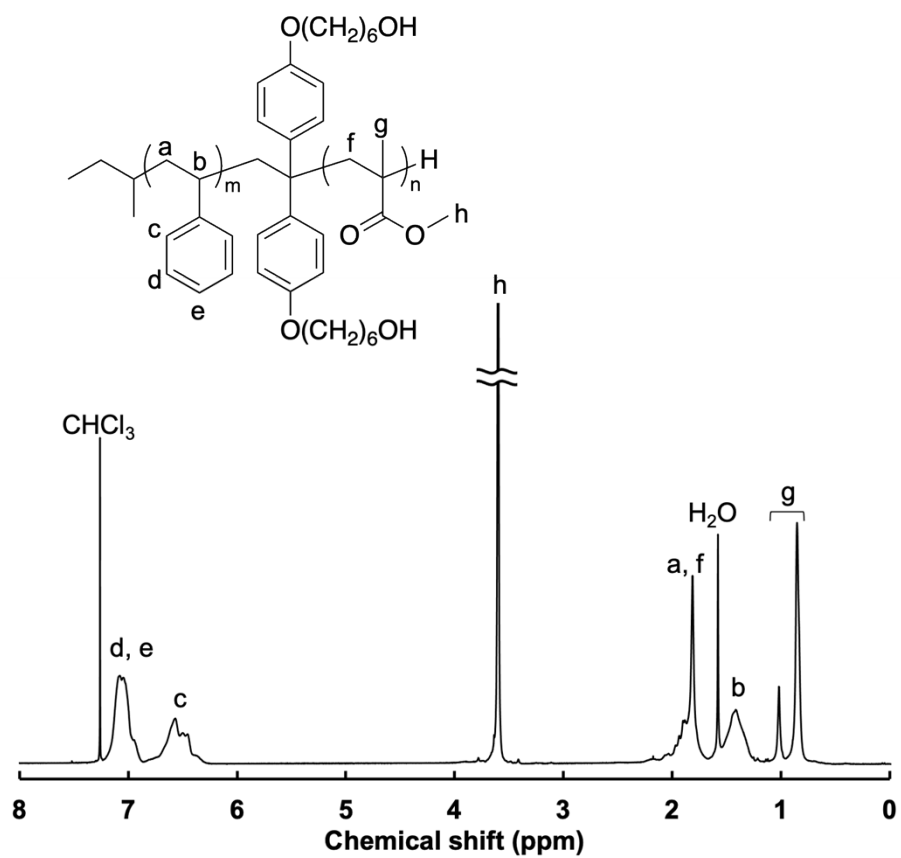

Fig. S8 <sup>1</sup>H NMR spectrum of PS-(OH)<sub>2</sub>-PMMA in CDCl<sub>3</sub> without TMS.

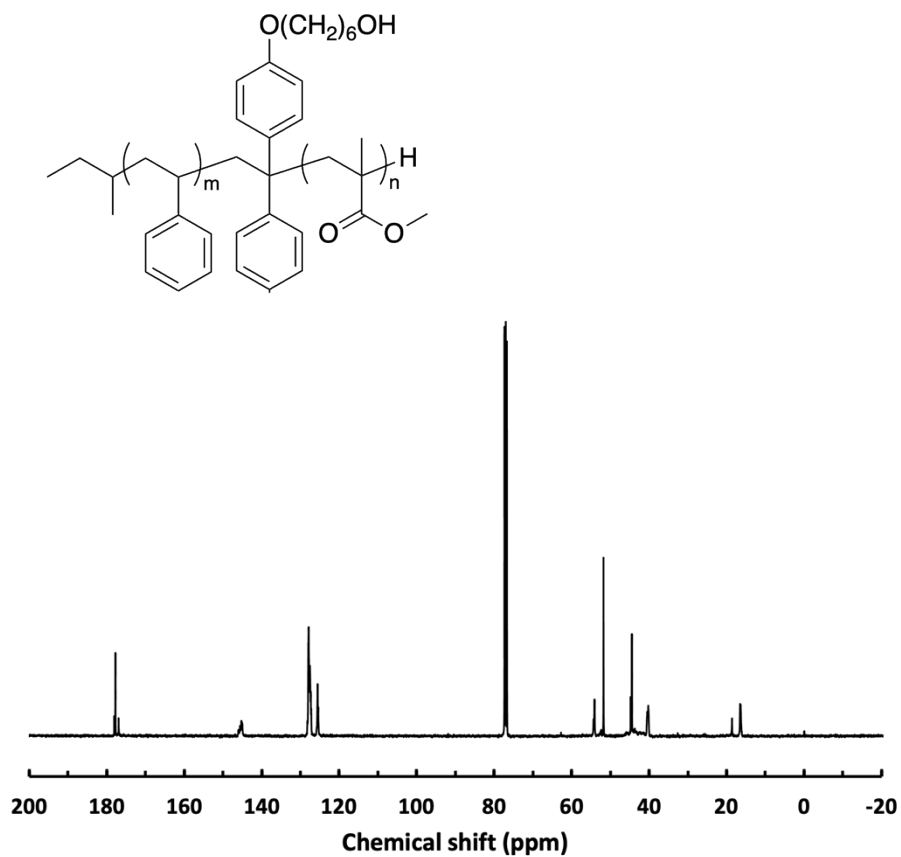

Fig. S9 <sup>13</sup>C NMR spectrum of PS-(OH)<sub>2</sub>-PMMA in CDCl<sub>3</sub>.

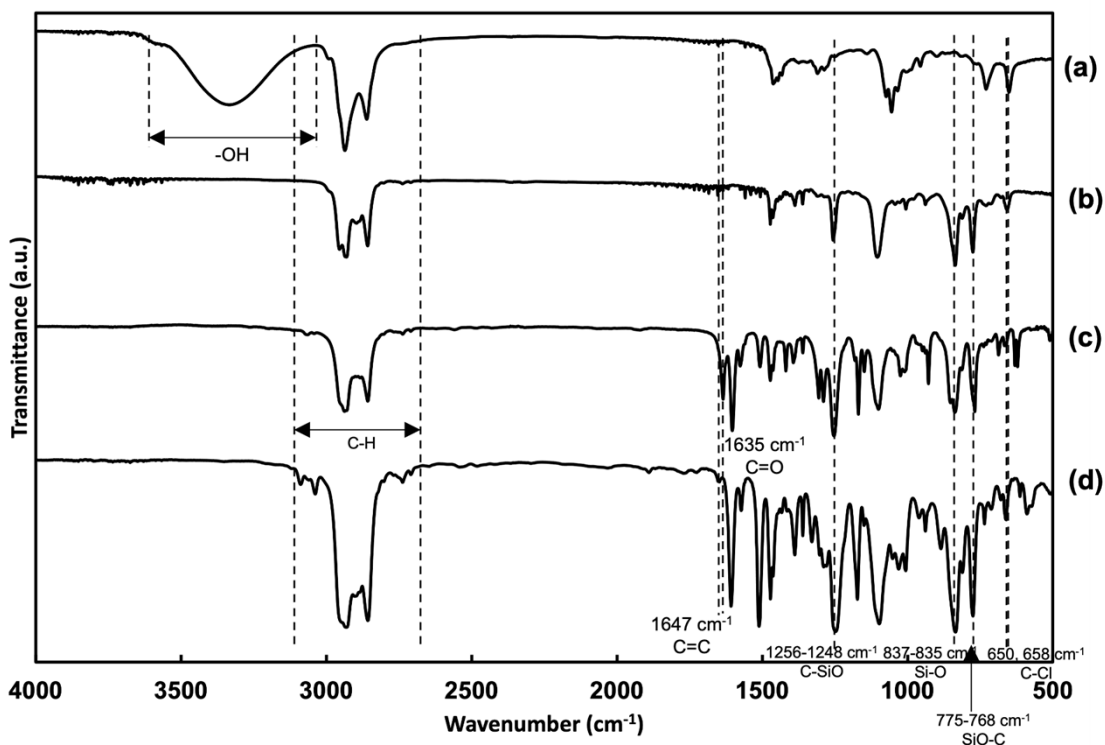

Fig. S10 FT-IR spectra of (a) 6-chloro-1-hexanol, (b) ClC<sub>6</sub>OTBS, (c) BP-(OTBS)<sub>2</sub> and (d) DPE-(OTBS)<sub>2</sub>.

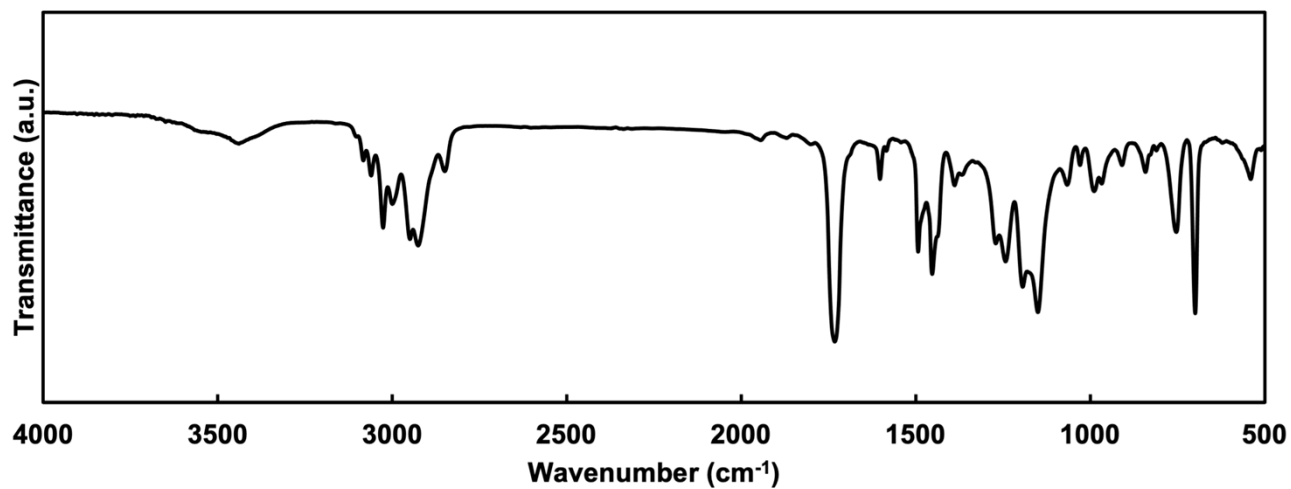

Fig. S11 FT-IR spectrum of PS-(OTBS)<sub>2</sub>-PMMA.

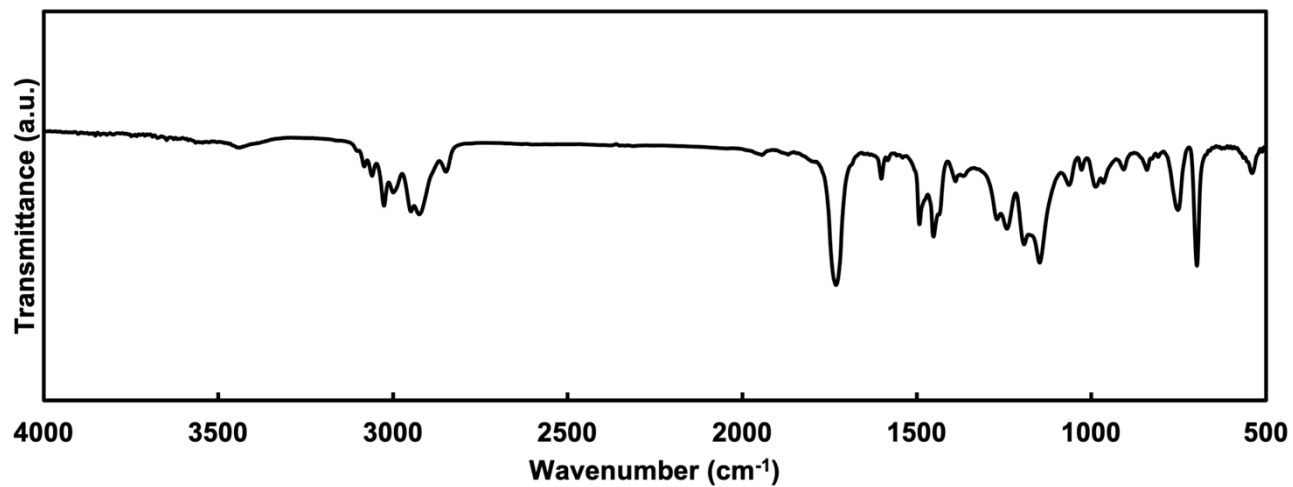

Fig. S12 FT-IR spectrum of PS-(OH)<sub>2</sub>-PMMA.

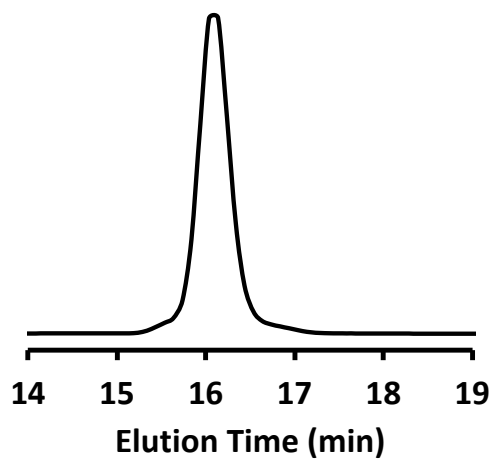

Fig. S13 SEC chromatogram of PS-(OTBS)<sub>2</sub>-PMMA.

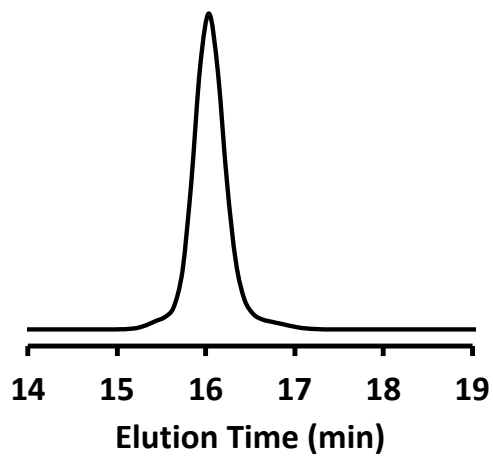

Fig. S14 SEC chromatogram of PS-(OH)<sub>2</sub>-PMMA.

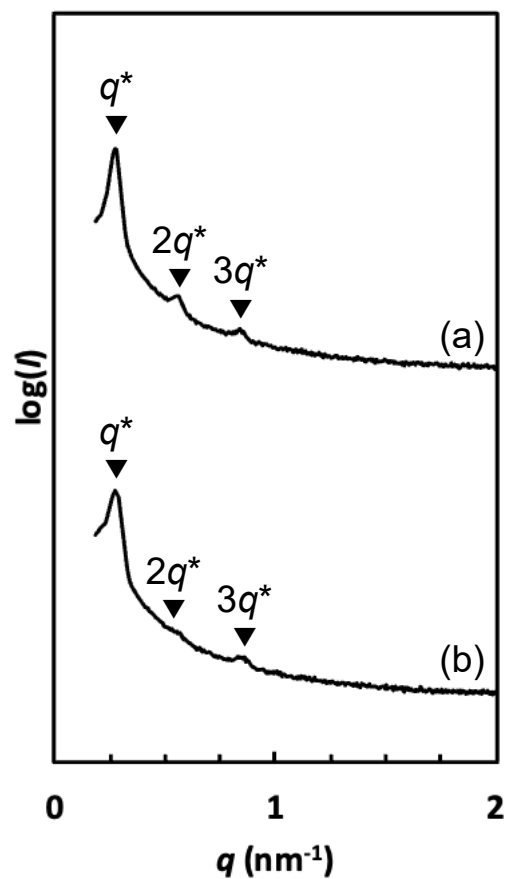

**Fig. S15** 1D SAXS profiles of (a) PS-(OTBS)<sub>2</sub>-PMMA and (b) PS-(OH)<sub>2</sub>-PMMA.

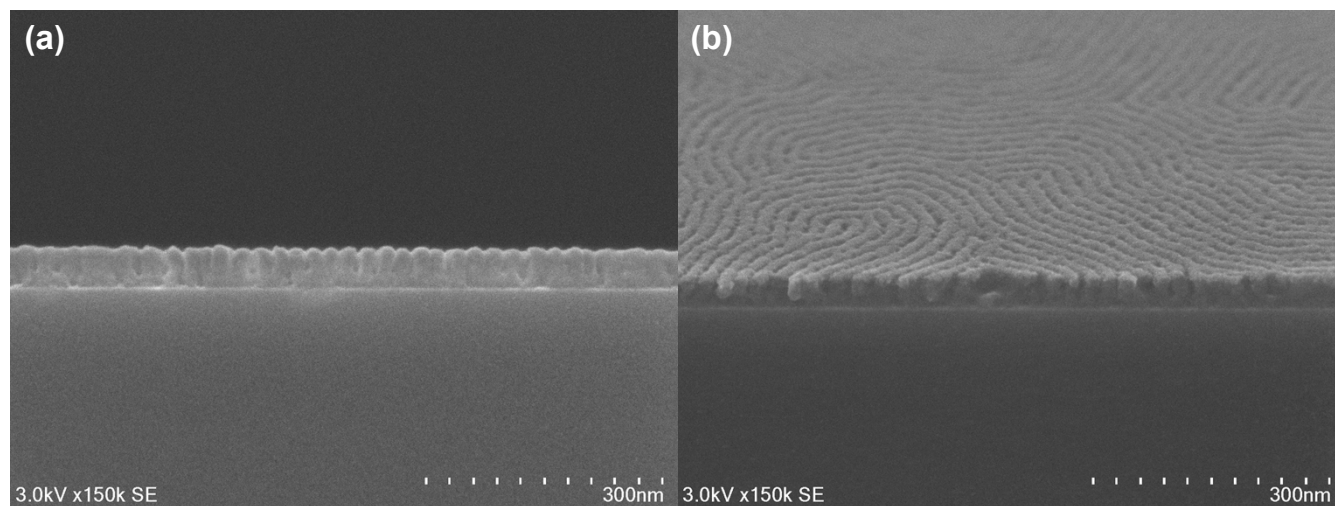

**Fig. S16** (a) Cross-sectional and (b) tilted FE-SEM images of a PS-(OH)<sub>2</sub>-PMMA thin film applied onto a PS-(OH)<sub>2</sub>-PMMA neutral layer, which were annealed for 20 minutes. Both images were taken without the etching of PMMA domains.



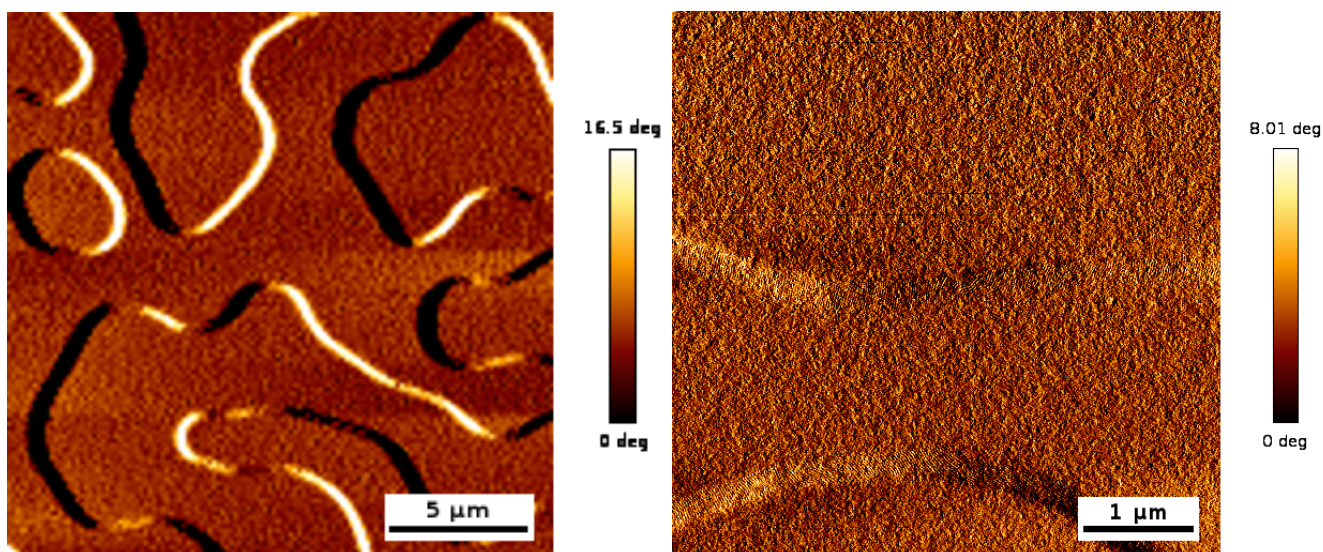

**Fig. S17** AFM phase images (20  $\mu\text{m}$  square, left, and 5  $\mu\text{m}$  square, right) of PS-(OH)<sub>2</sub>-PMMA thin films ( $\sim$  30 nm) applied onto a PS-(OTBS)<sub>2</sub>-PMMA neutral layer annealed for 30 minutes, exhibiting parallel orientation of lamellae.

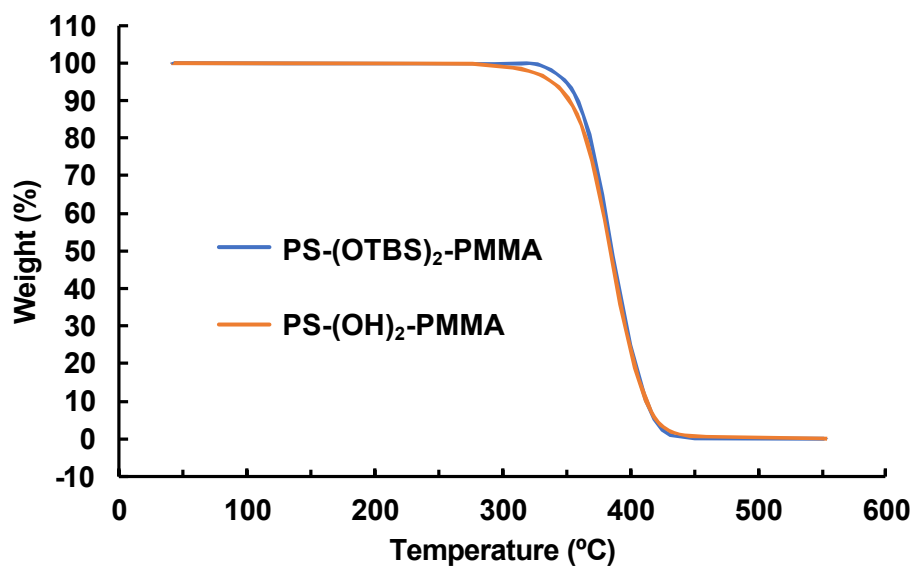

**Fig. S18** TG curves of PS-(OTBS)<sub>2</sub>-PMMA (blue line) and PS-(OH)<sub>2</sub>-PMMA (orange line). 5% weight loss temperatures are 350°C and 339°C, respectively.

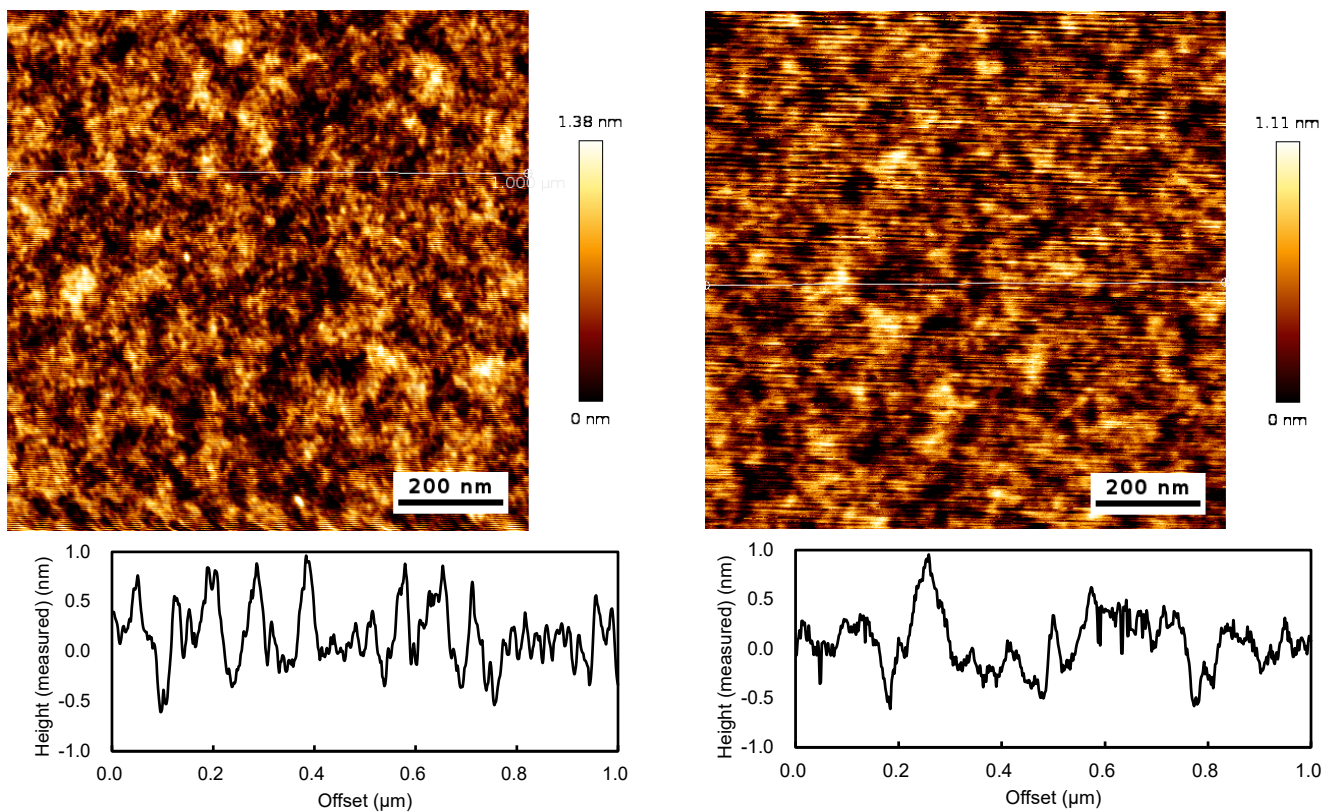

**Fig. S19** AFM height images of PS-(OH)<sub>2</sub>-PMMA neutral layers annealed for 1 minute (~ 6 nm, left) and 30 minutes (~ 8 nm, right), accompanied by the cross-sectional height profiles (taken from the white line in the images) below. The values of root-mean-square surface roughness of each NLs are 0.31 nm and 0.28 nm, respectively.

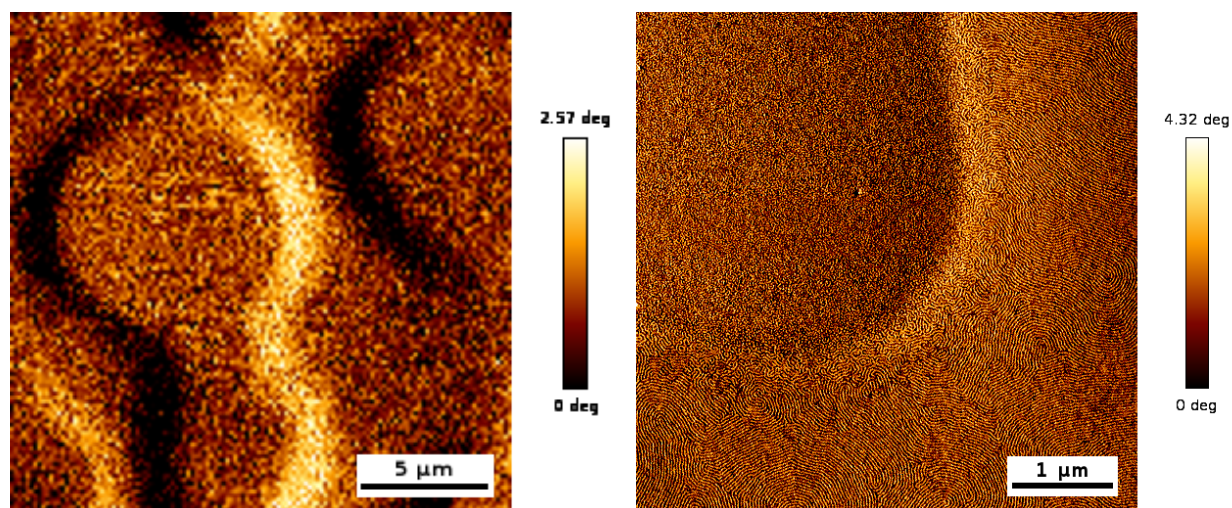

**Fig. S20** AFM phase images of a PS-(OH)<sub>2</sub>-PMMA thin film that were directly cast onto a Si substrate and annealed at 250°C for 30 minutes (~ 40 nm). Perpendicular orientation of lamellae was only partly observed.

## References

- 1 J. Wu, S. Bo, J. Liu, T. Zhou, H. Xiao, L. Qiu, Z. Zhen and X. Liu, *Chem. Commun.*, 2012, **48**, 9637-9639.
